# Supplementary material for: The determinants affecting the intention of urban residents to prevent flooding in China
Source: Copernicus journal article supplement (doi:10.5194/nhess-2021-379), 2021-12-23
Supplement: Supplementary file 1 [file nhess-2021-379-supplement.pdf]

1 *Supplement of*

2 **The determinants affecting the intention of urban**  
3 **residents to prevent flooding in China**

4 **Tiantian Wang et al.**

5 *Correspondence to:* Tiantian Wang ([wangtiantian@bit.edu.cn](mailto:wangtiantian@bit.edu.cn)) & Tiezhong Liu  
6 ([liutiezhong@bit.edu.cn](mailto:liutiezhong@bit.edu.cn))

7  
8 **Table S1**  
Flood-risk precautionary behavior scale.

| Constructs                 | Item | Description of question                                                                                                                            | Response scale (1-5)                    |
|----------------------------|------|----------------------------------------------------------------------------------------------------------------------------------------------------|-----------------------------------------|
| Intention (IN)             | IN1  | Reinforcement of houses or construction of water retaining walls.                                                                                  | “very reluctant to”-“very glad to”      |
|                            | IN2  | Prepare sandbags, life jackets and other emergency supplies.                                                                                       |                                         |
|                            | IN3  | Participate in emergency drills or learn about flooding.                                                                                           |                                         |
|                            | IN4  | Purchasing flood insurance.                                                                                                                        |                                         |
|                            | IN5  | <b>Move your house to a safe area away from flooding.</b>                                                                                          |                                         |
| Perceived likelihood (PL)  | PL1  | The number of occurrences of very heavy rainfall has increased in 5 years.                                                                         | “absolutely no”-“absolutely have”       |
|                            | PL2  | <b>Spending to withstand damage caused by heavy rainfall has increased.</b>                                                                        |                                         |
| Perceived consequence (PC) | PC1  | How likely do you think flooding is to cause damage to infrastructure (telecommunications, electrification and transportation, etc.) in your area? | “small”-“very high”                     |
|                            | PC2  | How likely do you think you are to be a victim (property damage or injury) in a flood?                                                             |                                         |
|                            | PC3  | How dangerous do you think the flood is to your life?                                                                                              |                                         |
| Response efficacy (RE)     | RE1  | Prepare sandbags, life jackets and other emergency supplies.                                                                                       | “not effective at all”-“very effective” |
|                            | RE2  | Participate in emergency drills or learn about flooding.                                                                                           |                                         |
|                            | RE3  | <b>Reinforcement of houses or construction of water retaining walls.</b>                                                                           |                                         |
|                            | RE4  | <b>Purchasing flood insurance.</b>                                                                                                                 |                                         |
|                            | RE5  | <b>Move your house to a safe area away from flooding.</b>                                                                                          |                                         |
| Self-efficacy (SE)         | SE1  | I think I have the ability to take the above flood protection measures.                                                                            | “strongly disagree”-“strongly agree”    |
|                            | SE2  | When a flood occurs, I think I will be able to keep my property safe.                                                                              |                                         |
|                            | SE3  | When the flood occurs, I think I have the ability to keep my life safe.                                                                            |                                         |
|                            | SE4  | When the flood occurs, I think I have the ability to help others out of danger.                                                                    |                                         |
|                            | AT1  | I don't think we can reduce the loss in the flood no matter what measures we take (fatalism).                                                      |                                         |
| Attitude (AT)              | AT2  | I think flood prevention is a matter for the authorities and has less to do with individuals.                                                      | “strongly disagree”-“strongly agree”    |
|                            | AT3  | <b>I think individuals have the responsibility to protect their families from floods.</b>                                                          |                                         |

|                    |            |                                                                                                           |                                   |
|--------------------|------------|-----------------------------------------------------------------------------------------------------------|-----------------------------------|
| Trust (TR)         | TR1        | I am confident that the flood defenses are maintained well.                                               |                                   |
|                    | TR2        | I have confidence in the technological skills of flood risk managers.                                     |                                   |
|                    | <b>TR3</b> | <b>I rely heavily on the local flood control facilities.</b>                                              |                                   |
| Response cost (RC) | RC1        | Prepare sandbags, life jackets and other emergency supplies.                                              |                                   |
|                    | RC2        | Participate in emergency drills or learn about flooding.                                                  |                                   |
|                    | <b>RC3</b> | <b>Reinforcement of houses or construction of water retaining walls.</b>                                  | “Very low-cost”-“very expensive”  |
|                    | <b>RC4</b> | <b>Purchasing flood insurance.</b>                                                                        |                                   |
|                    | <b>RC5</b> | <b>Move your house to a safe area away from flooding.</b>                                                 |                                   |
|                    |            |                                                                                                           |                                   |
|                    |            |                                                                                                           |                                   |
| Social norm (SN)   | SN1        | How much influence does your family have on your implementation of flood prevention measures?             |                                   |
|                    | SN2        | How much influence do your neighbors or friends have on your implementation of flood protection measures? | “Very small”-“Very high”          |
|                    | SN3        | What is the impact of government policies on your implementation of flood prevention measures?            |                                   |
|                    | W1         | Infrastructure is interrupted or destroyed in the area where you live.                                    |                                   |
|                    | W2         | Serious damage to your personal belongings.                                                               |                                   |
|                    | W3         | Destruction partial / total of your residence.                                                            | “quite don’t worry”- “very worry” |
| Worry (W)          | W4         | Injuries to individuals or family members.                                                                |                                   |
|                    | <b>W5</b>  | <b>Death of an individual or family member.</b>                                                           |                                   |

9 Note: The items of red were deleted according to factor loading below 0.5.

10 **Table S2**

11 Results of validation factor analysis.

| Construct | Item | Factor loading | Cronbach's alpha | CR    | AVE   |
|-----------|------|----------------|------------------|-------|-------|
| IN        | IN1  | 0.721          | 0.746            | 0.841 | 0.570 |
|           | IN2  | 0.839          |                  |       |       |
|           | IN3  | 0.716          |                  |       |       |
|           | IN4  | 0.736          |                  |       |       |
| PL        | PL1  | 1.000          | 1.000            | 1.000 | 1.000 |
| PC        | PC1  | 0.809          | 0.778            | 0.871 | 0.693 |
|           | PC2  | 0.861          |                  |       |       |
|           | PC3  | 0.825          |                  |       |       |
| RE        | RE1  | 0.886          | 0.720            | 0.839 | 0.722 |
|           | RE2  | 0.813          |                  |       |       |
| SE        | SE1  | 0.810          | 0.819            | 0.878 | 0.643 |
|           | SE2  | 0.831          |                  |       |       |
|           | SE3  | 0.784          |                  |       |       |
|           | SE4  | 0.781          |                  |       |       |
| RC        | RC1  | 0.921          | 0.782            | 0.858 | 0.752 |
|           | RC2  | 0.811          |                  |       |       |
| AT        | AT1  | 0.728          | 0.746            | 0.717 | 0.594 |
|           | AT2  | 0.921          |                  |       |       |
| W         | W1   | 0.792          | 0.850            | 0.899 | 0.690 |
|           | W2   | 0.865          |                  |       |       |
|           | W3   | 0.825          |                  |       |       |
|           | W4   | 0.838          |                  |       |       |
| SN        | SN1  | 0.854          | 0.732            | 0.849 | 0.653 |
|           | SN2  | 0.820          |                  |       |       |
|           | SN3  | 0.747          |                  |       |       |
| TR        | TR1  | 0.918          | 0.769            | 0.896 | 0.811 |
|           | TR2  | 0.883          |                  |       |       |

12 Note: IN: Intention; PL: Perceived likelihood; PC: Perceived consequence; RE: Response efficacy; SE:

13 Self-efficacy; RC: Response cost; AT: Attitude; W: Worry; SN: Social norm; TR: Trust.

14 **Table S3**

15 The result of Fornell-Larcker criterion.

| Construct | IN     | PL     | PC     | RE     | SE     | RC    | AT     | W      | SN    | TR  |
|-----------|--------|--------|--------|--------|--------|-------|--------|--------|-------|-----|
| IN        | 0.754  |        |        |        |        |       |        |        |       |     |
| PL        | 0.208  | 1      |        |        |        |       |        |        |       |     |
| PC        | 0.302  | 0.522  | 0.832  |        |        |       |        |        |       |     |
| RE        | 0.469  | 0.03   | 0.134  | 0.753  |        |       |        |        |       |     |
| SE        | 0.278  | 0.019  | -0.098 | 0.201  | 0.802  |       |        |        |       |     |
| RC        | 0.107  | 0.128  | 0.081  | -0.017 | 0.15   | 0.738 |        |        |       |     |
| AT        | -0.132 | 0.07   | -0.023 | -0.168 | 0.078  | 0.243 | 0.773  |        |       |     |
| W         | 0.312  | 0.181  | 0.38   | 0.221  | -0.054 | 0.097 | -0.087 | 0.825  |       |     |
| SN        | 0.301  | 0.159  | 0.21   | 0.25   | 0.195  | 0.084 | -0.021 | 0.212  | 0.808 |     |
| TR        | 0.103  | -0.134 | -0.139 | 0.132  | 0.19   | 0.033 | -0.067 | -0.055 | 0.169 | 0.9 |

16 Note: The number on the diagonal is the square root of the latent variable AVE, and the number below the diagonal is the correlation coefficient between the latent variables.

17 IN: Intention; PL: Perceived likelihood; PC: Perceived consequence; RE: Response efficacy; SE: Self-efficacy; RC: Response cost; AT: Attitude; W: Worry; SN: Social norm;

18 TR: Trust.

19 **Table S4**

20 The result of HTMT.

| Construct | IN    | PL    | PC    | RE    | SE    | RC    | AT    | W     | SN    | TR |
|-----------|-------|-------|-------|-------|-------|-------|-------|-------|-------|----|
| IN        |       |       |       |       |       |       |       |       |       |    |
| PL        | 0.238 |       |       |       |       |       |       |       |       |    |
| PC        | 0.393 | 0.595 |       |       |       |       |       |       |       |    |
| RE        | 0.679 | 0.06  | 0.187 |       |       |       |       |       |       |    |
| SE        | 0.343 | 0.026 | 0.131 | 0.277 |       |       |       |       |       |    |
| RC        | 0.205 | 0.172 | 0.116 | 0.142 | 0.232 |       |       |       |       |    |
| AT        | 0.149 | 0.12  | 0.097 | 0.253 | 0.09  | 0.521 |       |       |       |    |
| W         | 0.385 | 0.194 | 0.458 | 0.295 | 0.096 | 0.149 | 0.149 |       |       |    |
| SN        | 0.407 | 0.185 | 0.277 | 0.372 | 0.245 | 0.17  | 0.121 | 0.264 |       |    |
| TR        | 0.144 | 0.148 | 0.177 | 0.2   | 0.233 | 0.062 | 0.068 | 0.069 | 0.229 |    |

21 Note: IN: Intention; PL: Perceived likelihood; PC: Perceived consequence; RE: Response efficacy; SE: Self-efficacy; RC: Response cost; AT: Attitude; W: Worry; SN: Social  
 22 norm; TR: Trust.

23 **Table S5**

24 Results of structural model.

|      | Hypothesis  | Path coefficient | T-statistic value   | P-value |
|------|-------------|------------------|---------------------|---------|
| H1a: | PL → IN     | 0.072            | 3.151**             | 0.002   |
| H1b: | PC → IN     | 0.167            | 6.369***            | 0.000   |
| H1c: | PL → W → IN | -0.003           | 0.960 <sup>ns</sup> | 0.337   |
| H1d: | PC → W → IN | 0.057            | 5.325***            | 0.000   |
| H2a: | RE → IN     | 0.329            | 11.721***           | 0.000   |
| H2b: | SE → IN     | 0.209            | 9.182***            | 0.000   |
| H2c: | RC → IN     | 0.059            | 2.759**             | 0.006   |
| H3:  | AT → IN     | -0.091           | 4.026***            | 0.000   |
| H4:  | SN → IN     | 0.088            | 4.221***            | 0.000   |
| H5a: | TR → AT     | -0.067           | 2.542*              | 0.011   |
| H5b: | TR → PL     | -0.134           | 5.263***            | 0.000   |
| H5c: | TR → PC     | -0.139           | 5.713***            | 0.000   |
| H5d: | TR → IN     | 0.038            | 1.878 <sup>ns</sup> | 0.061   |

25 Note: \*\*\* p < 0.001, \*\* p < 0.01, \* p < 0.05, <sup>ns</sup> p > 0.05. IN: Intention; PL: Perceived likelihood; PC:  
 26 Perceived consequence; RE: Response efficacy; SE: Self-efficacy; RC: Response cost; AT: Attitude; W:  
 27 Worry; SN: Social norm; TR: Trust.

**Table S6**

29 Direct, indirect and total effects of antecedents to intention.

| Path    | Total effects (c + a * b) | Direct effects (c)   | Indirect path    | Indirect effects (a*b) |
|---------|---------------------------|----------------------|------------------|------------------------|
| AT → IN | -0.091***                 | -0.091***            |                  |                        |
| PC → IN | 0.224***                  | 0.167***             | PC → W → IN      | 0.057***               |
| PC → W  | 0.393***                  | 0.393***             |                  |                        |
| PL → IN | 0.068**                   | 0.072**              | PL → W → IN      | -0.003 <sup>ns</sup>   |
| PL → W  | -0.024 <sup>ns</sup>      | -0.024 <sup>ns</sup> |                  |                        |
| RC → IN | 0.059**                   | 0.059**              |                  |                        |
| RE → IN | 0.329***                  | 0.329***             |                  |                        |
| SE → IN | 0.209***                  | 0.209***             |                  |                        |
| SN → IN | 0.088***                  | 0.088***             |                  |                        |
| TR → AT | -0.067*                   | -0.067*              |                  |                        |
| TR → IN | 0.004 <sup>ns</sup>       | 0.038 <sup>ns</sup>  | TR → PL → IN     | -0.010**               |
|         |                           |                      | TR → PL → W → IN | 0.000 <sup>ns</sup>    |
|         |                           |                      | TR → PC → IN     | -0.023***              |
|         |                           |                      | TR → PC → W → IN | -0.008***              |
|         |                           |                      | TR → AT → IN     | 0.006*                 |
| TR → PC | -0.139***                 | -0.139***            |                  |                        |
| TR → PL | -0.134***                 | -0.134***            |                  |                        |
| W → IN  | 0.144***                  | 0.144***             |                  |                        |

30 Note: \*\*\* p < 0.001, \*\* p < 0.01, \* p < 0.05, <sup>ns</sup> p > 0.05. IN: Intention; PL: Perceived likelihood; PC: Perceived consequence; RE: Response efficacy; SE: Self-efficacy; RC:

31 Response cost; AT: Attitude; W: Worry; SN: Social norm; TR: Trust.

**Table S7**

Means, standard deviations and correlations between all constructs.

| Construct | M    | SD   | IN     | PL     | PC     | RE     | SE     | RC    | AT     | W      | SN    | TR |
|-----------|------|------|--------|--------|--------|--------|--------|-------|--------|--------|-------|----|
| IN        | 3.77 | 1.12 | 1      |        |        |        |        |       |        |        |       |    |
| PL        | 2.72 | 1.11 | 0.208  | 1      |        |        |        |       |        |        |       |    |
| PC        | 3.33 | 1.20 | 0.302  | 0.522  | 1      |        |        |       |        |        |       |    |
| RE        | 4.09 | 0.84 | 0.469  | 0.03   | 0.134  | 1      |        |       |        |        |       |    |
| SE        | 3.27 | 1.02 | 0.278  | 0.019  | -0.098 | 0.201  | 1      |       |        |        |       |    |
| RC        | 2.72 | 0.98 | 0.107  | 0.128  | 0.081  | -0.017 | 0.15   | 1     |        |        |       |    |
| AT        | 2.13 | 1.08 | -0.132 | 0.07   | -0.023 | -0.168 | 0.078  | 0.243 | 1      |        |       |    |
| W         | 3.92 | 1.15 | 0.312  | 0.181  | 0.38   | 0.221  | -0.054 | 0.097 | -0.087 | 1      |       |    |
| SN        | 3.58 | 1.02 | 0.301  | 0.159  | 0.21   | 0.25   | 0.195  | 0.084 | -0.021 | 0.212  | 1     |    |
| TR        | 3.59 | 0.88 | 0.103  | -0.134 | -0.139 | 0.132  | 0.19   | 0.033 | -0.067 | -0.055 | 0.169 | 1  |

Note: IN: Intention; PL: Perceived likelihood; PC: Perceived consequence; RE: Response efficacy; SE: Self-efficacy; RC: Response cost; AT: Attitude; W: Worry; SN: Social norm; TR: Trust.
